# Supplementary material for: Perylene carboxylate-modified titanium–oxide gel, a functional material with photoswitchable fluorescence properties
Source: Royal Society of Chemistry journal article supplement (doi:10.1039/c3tc31607f), 2013-01-01
Supplement: c3tc31607f.pdf [file c3tc31607f.pdf]

ESI for

## **Perylene carboxylate modified titanium-oxide gel, a functional material with photoswitchable fluorescent property**

**Peng Wang,<sup>a</sup> Yin-Yin Wu,<sup>a</sup> Jing Wu,<sup>a</sup> Sheng Wang,<sup>a</sup> Lan Yu,<sup>a</sup> Qin-Yu Zhu,<sup>\*a,b</sup> and Jie Dai<sup>\*a,b</sup>**

**Fig. S1** EDS analysis of the precipitate confirmed that it contains Ti, O and C.

**Fig. S2** The FTIR spectrum of the precipitate confirmed the PTC-TiO coordination state.

**Fig. S3** The schematical view of the *G*-form (a) and *O*-form (b) in PTC-TiO solution or gel.

**Fig. S4** The XRD results of the films by coating the gel on glass substrate, indicating the amorphous nature.

**Fig. S5** The TG results of the gels in different dryness.

**Fig. S6** The XPS results of the PTC-TiO dry gel, (a) Ti2p, (b) C1s and (c) O1s.

**Fig. S7** The photographs of the *G*-form gels (a), after irradiation (b) and then oxygen blowing (c).

**Fig. S8** The photographs of the fluorescence of the *G*-form gels (a), after irradiation (b) and then oxygen blowing (c).

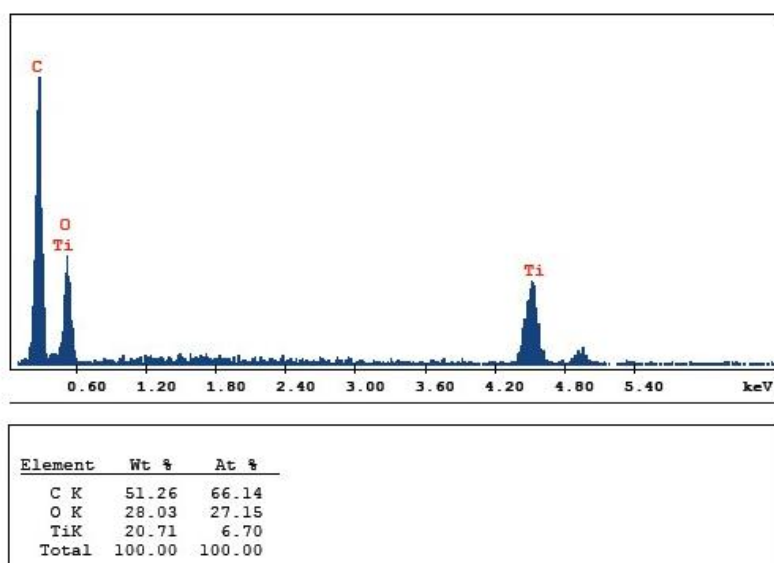

**Fig. S1** EDS analysis of the precipitate confirmed that it contains Ti, O and C.

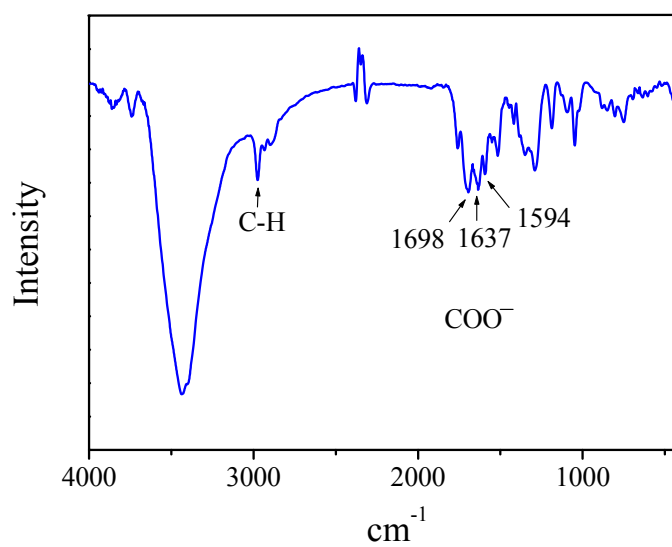

**Fig. S2** The FTIR spectrum of the precipitate confirmed the PTC-TiO coordination state.

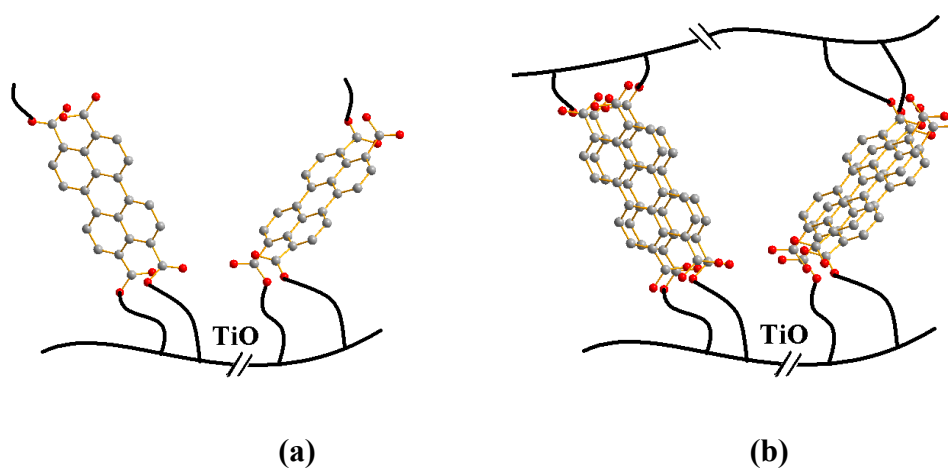

**Fig. S3** The schematical view of the *G*-form (a) and *O*-form (b) in PTC-TiO solution or gel.

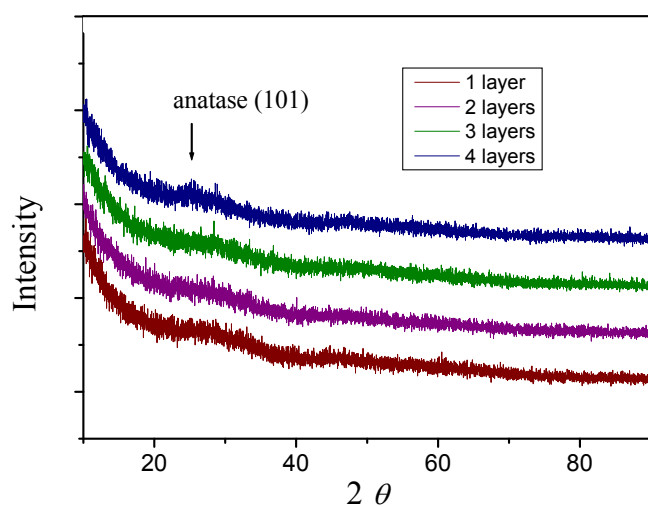

**Fig. S4** The XRD results of the films by coating the gel on glass substrate, indicating the amorphous nature.

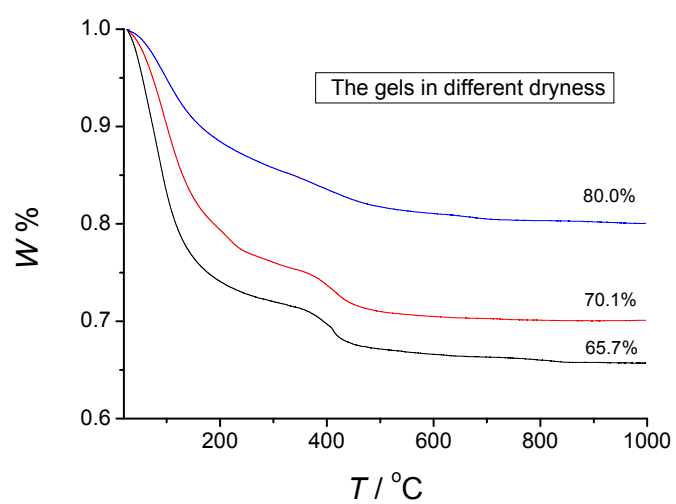

**Fig. S5** The TG results of the gels in different dryness.

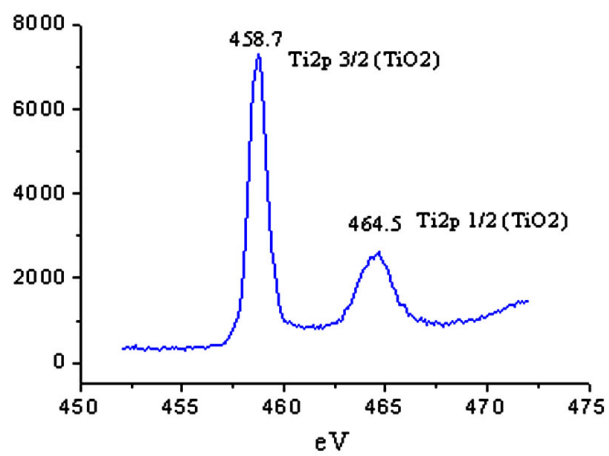

(a)

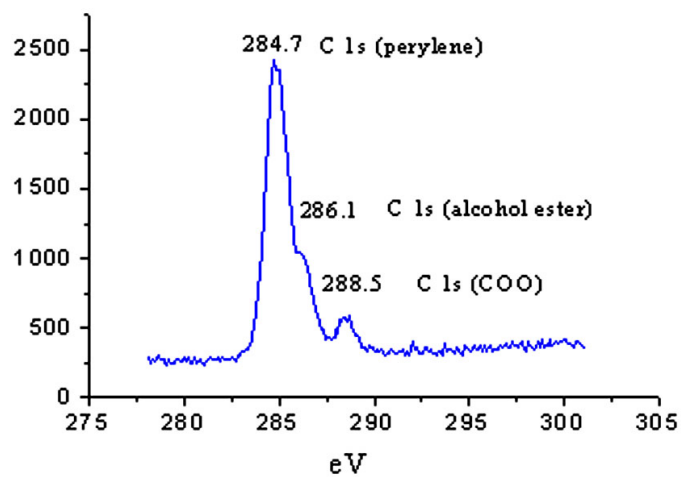

(b)

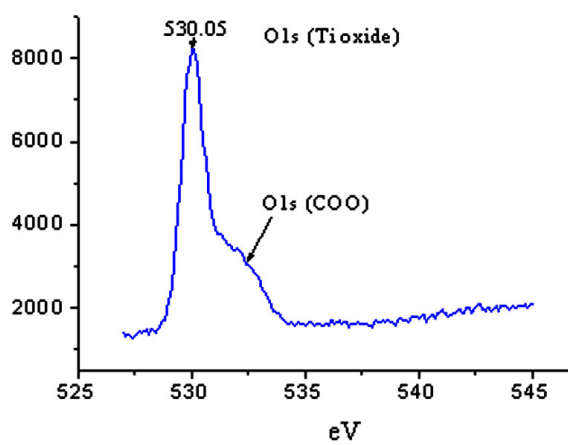

(c)

**Fig. S6** The XPS results of the PTC-TiO dry gel, (a) Ti2p, (b) C1s and (c) O1s.

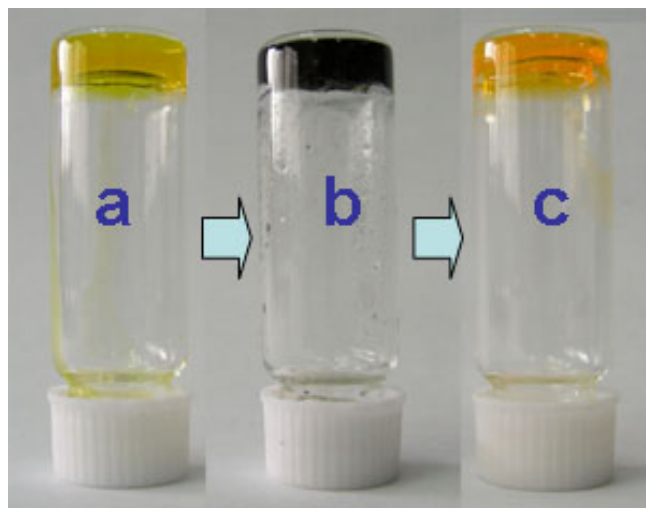

**Fig. S7** The photographs of the *G*-form gels (a), after irradiation (b) and then oxygen blowing (c).

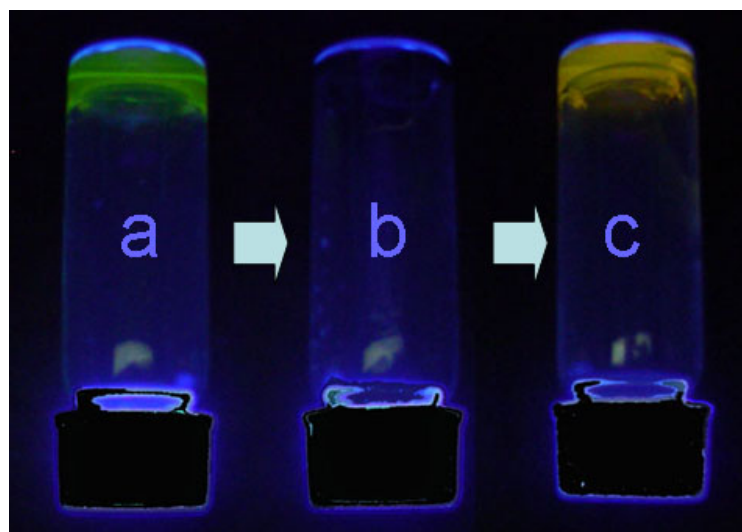

**Fig. S8** The photographs of the fluorescence of the *G*-form gels (a), after irradiation (b) and then oxygen blowing (c).
